# Supplementary material
Source: PubMed Central journal article supplement (PMC5946318)
Supplement: NIHMS961281-supplement-Appendix_B.pdf [file NIHMS961281-supplement-Appendix_B.pdf]

**Appendix B.** Unstandardized Coefficients for GMM Models of Life Expectancy at Birth, Female Life Expectancy at Age 65, Male Life Expectancy at Age 65, and All-cause Mortality Rate on Medical Expansion and Other National Predictors in Multiple Imputed Data (t Statistics in Parentheses).

|                                                          | Life Expectancy<br>at Birth | Female Life<br>Expectancy at<br>Age 65 | Male Life<br>Expectancy at<br>Age 65 | All-cause<br>Mortality Rate |
|----------------------------------------------------------|-----------------------------|----------------------------------------|--------------------------------------|-----------------------------|
| Lagged dependent variable                                | .867***<br>(39.91)          | .794***<br>(25.52)                     | .772***<br>(24.90)                   | .746***<br>(22.82)          |
| <i>Medical Expansion</i>                                 |                             |                                        |                                      |                             |
| Medical investment                                       | .204**<br>(2.35)            | .164*<br>(1.96)                        | .326***<br>(4.63)                    | -24.127*<br>(-2.48)         |
| Expanded pharmaceutical industry                         | .009<br>(.24)               | -.050<br>(-1.32)                       | -.061*<br>(-1.97)                    | 7.989*<br>(1.96)            |
| Medical professionalization/<br>specialization           | .081<br>(1.33)              | .087<br>(1.53)                         | .033<br>(.75)                        | -17.047**<br>(-2.71)        |
| GDP per capita                                           | .000***<br>(3.51)           | .000***<br>(3.98)                      | .000***<br>(5.78)                    | -.001<br>(-1.74)            |
| % of women in labor force                                | .000<br>(-.01)              | .000<br>(-.03)                         | .001<br>(.09)                        | -1.521<br>(-1.70)           |
| General government consumption<br>expenditure (% of GDP) | -.009<br>(-.90)             | -.000<br>(-.05)                        | -.002<br>(-.22)                      | 2.131<br>(1.91)             |
| Household consumption expenditure<br>(% of GDP)          | .010<br>(1.61)              | .008<br>(1.26)                         | .007<br>(1.51)                       | .242<br>(.40)               |
| Foreign direct investment, net inflows<br>(% of GDP)     | -.002<br>(-.49)             | -.002<br>(-.64)                        | .001<br>(.29)                        | -.079<br>(-.21)             |
| Industry value added                                     | .000<br>(-.12)              | .000<br>(.58)                          | .000<br>(.30)                        | .000<br>(.70)               |
| Gross capital formation                                  | .000<br>(-.35)              | .000<br>(.55)                          | .000<br>(-.60)                       | .000<br>(-.49)              |
| % of total population in urban areas                     | .026*<br>(2.04)             | .001<br>(.07)                          | -.009<br>(-.99)                      | -2.097*<br>(-2.02)          |

Source: Organisation for Economic Co-operation health data and Development and World Development Index, 1981–2007.

\* $p < .05$ , \*\* $p < .01$ , \*\*\* $p < .001$ .

Appendix B. Unstandardized Coefficients for GMM Models of Life Expectancy at Birth, Female Life Expectancy at Age 65, Male Life Expectancy at Age 65, and All-cause Mortality Rate on Medical Expansion and Other National Predictors in Multiple Imputed Data (t Statistics in Parentheses).
